# Supplementary material
Source: PubMed Central journal article supplement (PMC3640277)
Supplement: NIHMS461304-supplement-1_si_001.pdf [file NIHMS461304-supplement-1_si_001.pdf]

**SUPRAMOLECULAR COMPOSITE MATERIALS FROM  
CELLULOSE, CHITOSAN AND CYCLODEXTRIN:  
FACILE PREPARATION AND THEIR SELECTIVE INCLUSION  
COMPLEX FORMATION WITH ENDOCRINE DISRUPTORS**

Simon Duri and Chieu D. Tran\*

Department of Chemistry, Marquette University, P. O. Box 1881, Milwaukee, WI 53201

**SUPPORTING INFORMATION**

**Analysis of Kinetic Data**

The pseudo-first-order, pseudo-second-order and intra-particle diffusion kinetic models were used to evaluate the adsorption kinetics of different polychlorophenols and BPA and to quantify the extent of uptake in the adsorption process

*Pseudo-first-order kinetic model*

The linear form of Lagergren's pseudo-first-order equation is given as:<sup>1</sup>

$$\ln(q_e - q_t) = \ln q_e - k_1 t \quad \text{[SI-1]}$$

where  $q_t$  and  $q_e$  are the amount of pollutant adsorbed at time  $t$  and at equilibrium ( $\text{mg g}^{-1}$ ) respectively and  $k_1$  ( $\text{min}^{-1}$ ) is the pseudo first order rate constant calculated from the slope of the linear plot of  $\ln(q_e - q_t)$  versus  $t$ .

*Pseudo-second-order kinetic model*

According to the Ho model, the rate of pseudo second order reaction may be dependent on the amount of species on the surface of the sorbent and the amount of species sorbed at equilibrium. The equilibrium sorption capacity,  $q_e$ , is dependent on factors such as temperature, initial

concentration and the nature of solute-sorbent interactions. The linear expression for the Ho model can be represented as follows:<sup>1</sup>

$$\frac{t}{q_t} = \frac{1}{k_2 q_e^2} + \frac{1}{q_e} t \quad [SI - 2]$$

where  $k_2$  is the pseudo-second order rate constant of sorption (g/mg.min),  $q_e$  is the amount of analyte adsorbed at equilibrium (mg/g),  $q_t$  is the amount of analyte adsorbed at any time  $t$  (mg/g).

If the initial adsorption rate  $h$  is

$$h = k_2 q_e^2 \quad [SI-3]$$

Then Eq SI-2 can be rearranged as

$$\frac{t}{q_t} = \frac{1}{h} + \frac{1}{q_e} t \quad [SI-4]$$

A linear plot can be obtained by plotting  $t/q_t$  against  $t$ .  $q_e$  and  $h$ , can obtained from the slope and intercept;  $k_2$  can be calculated from  $h$  and  $q_e$  according to Eq SI-3.

#### Intra-particle diffusion model

The intra-particle diffusion equation is given as follows:<sup>2,3</sup>

$$q_t = k_i t^{0.5} + I \quad [SI-5]$$

where  $k_i$  ( $\text{mg g}^{-1} \text{min}^{-0.5}$ ) is the intra-particle diffusion rate constant and  $I$  ( $\text{mg g}^{-1}$ ) is a constant that gives the information regarding the thickness of the boundary layer<sup>2,3</sup>. According to this model, if the plot of  $q_t$  versus  $t^{0.5}$  gives a straight line, then the adsorption process is controlled by intra-particle diffusion, while, if the data exhibit multi-linear plots, then two or more steps influence the adsorption process.

#### **Analysis of Adsorption isotherms**

Different isotherm models have been developed for describing sorption equilibrium. The Langmuir, Freundlich and Dubinin–Radushkevich (D–R) isotherms were used in the present study.

Langmuir isotherm. The Langmuir sorption isotherm describes that the uptake occurs on a homogeneous surface by monolayer sorption without interaction between adsorbed molecules and is commonly expressed as (Langmuir, 1916):<sup>4</sup>

$$\frac{C_e}{q_e} = \frac{C_e}{q_m} + \frac{1}{K_L q_m} \quad [\text{SI-6}]$$

where  $q_e$  ( $\text{mg g}^{-1}$ ) and  $C_e$  ( $\text{mg L}^{-1}$ ) are the solid phase concentration and the liquid phase concentration of adsorbate at equilibrium respectively,  $q_m$  ( $\text{mg g}^{-1}$ ) is the maximum adsorption capacity, and  $K_L$  ( $\text{L mg}^{-1}$ ) is the adsorption equilibrium constant. The constants  $K_L$  and  $q_m$  can be determined from the slope and intercept of the plot between  $C_e/q_e$  and  $C_e$ .

Freundlich isotherm. The Freundlich isotherm is applicable to non-ideal adsorption on heterogeneous surfaces and the linear form of the isotherm can be represented as (Freundlich, 1906):<sup>5</sup>

$$\log q_e = \log K_F + \left(\frac{1}{n}\right) \log C_e \quad [\text{SI-7}]$$

where  $q_e$  ( $\text{mg g}^{-1}$ ) is the equilibrium concentration on adsorbent,  $C_e$  ( $\text{mg L}^{-1}$ ) is the equilibrium concentration in solution,  $K_F$  ( $\text{mg g}^{-1}$ ) ( $\text{L g}^{-1}$ )<sup>1/n</sup> is the Freundlich constant related to sorption capacity and  $n$  is the heterogeneity factor.  $K_F$  and  $1/n$  are calculated from the intercept and slope of the straight line of the plot  $\log q_e$  versus  $\log C_e$ .  $n$  value is known to be a measure of the favorability of the sorption process.<sup>6</sup> A value between 1 and 10 is known to represent a favorable sorption.

Dubinin–Radushkevich (D–R) isotherm. The Dubinin–Radushkevich (D–R) isotherm model envisages about the heterogeneity of the surface energies and has the following formulation:<sup>7</sup>

$$\ln q_e = \ln q_m - \beta \varepsilon^2 \quad [\text{SI-8}]$$

$$\varepsilon = RT \ln \left( 1 + \frac{1}{C_e} \right) \quad [\text{SI-9}]$$

where  $q_m$  ( $\text{mg g}^{-1}$ ) is the maximum adsorption capacity,  $\beta$  ( $\text{mmol}^2 \text{J}^{-2}$ ) is a coefficient related to the mean free energy of adsorption,  $\varepsilon$  ( $\text{J mmol}^{-1}$ ) is the Polanyi potential,  $R$  is the gas constant ( $8.314 \text{ J mol}^{-1} \text{ K}^{-1}$ ),  $T$  is the temperature (K) and  $C_e$  ( $\text{mg L}^{-1}$ ) is the equilibrium concentration. The D–R constants  $q_m$  and  $\beta$  can be determined from the intercept and slope of the plot between  $\ln q_e$  and  $\varepsilon^2$ .

The constant  $\beta$  in the D-R isotherm model is known to relate to the mean free energy  $E$  ( $\text{KJ mol}^{-1}$ ) of the sorption process per mole of the analyte which in turn can give information about the sorption mechanism.  $E$  can be calculated using the equation 1 below.<sup>8</sup>

$$E = \frac{1}{\sqrt{2\beta}} \quad [\text{SI-10}]$$

According to this theory, the adsorption process is supposed to proceed via chemisorb if  $E$  is between 8 and 16  $\text{KJmol}^{-1}$  whereas for values less than 8  $\text{KJmol}^{-1}$ , the sorption process is often governed by physical nature<sup>8</sup>.

## REFERENCES

- (1) Chakraborty, S.; Chowdhury, S.; Saha, P. D. Adsorption of Crystal Violet from aqueous solution onto NaOH-modified rice husk. *Carbohydrate Polymers*. **2011**, 86, 1533 – 1541.
- (2) Weber, J. W.; Morris, J. C. Kinetics of adsorption of carbon from solution. *J. Sanit. Eng. Div. Am. Soc. Civ. Eng.* **1963**, 89, 31-39.
- (3) Gu, W.; Sun, C.; Liu, Q.; Cui, H. Adsorption of avermectins on activated carbon: Equilibrium, kinetics, and UV-shielding. *Trans. Nonferrous Met. Soc. China*. **2009**, 19, 845 – 850.
- (4) Langmuir, I. The constitution and fundamental properties of solids and liquids. *J. Am. Chem. Soc.* **1916**, 38, 2221 – 2295.
- (5) Freundlich, H. M. F. Over the adsorption in solution. *J. Phys. Chem.* **1906**, 57A, 385 – 471.
- (6) Chowdhury, S.; Chakraborty, S.; Saha, P. Biosorption of Basic Green 4 from aqueous solution by *Ananas comosus* (pineapple) leaf powder. *Colloids and surfaces B: Biointerfaces*. **2011**, 84, 520 – 527.
- (7) Dubinin, M. M. Radushkevich, L. V. The equation of the characteristic curve of the activated charcoal. *Proc. Acad. Sci. USSR Phys. Chem. Sect.*, **1947**, 55, 331 – 337.
- (8) Kundu, S.; Gupta, A. K. Arsenic adsorption onto iron oxide-coated cement (IOCC): regression analysis of equilibrium data with several isotherm models and their optimization. *Chem. Eng. J.* **2006**, 122, 96 – 106.

Table SI-1. Kinetic parameters for adsorption of Chlorophenols and BPA onto 100% CS film

| Analyte               | qe, expt<br>(M/g) | Pseudo first-order kinetic model |                                     |                |       | Pseudo second-order kinetic model |                                                     |                |      |
|-----------------------|-------------------|----------------------------------|-------------------------------------|----------------|-------|-----------------------------------|-----------------------------------------------------|----------------|------|
|                       |                   | qe(M/g)                          | K <sub>1</sub> (min <sup>-1</sup> ) | R <sup>2</sup> | MSC   | qe(M/g)                           | K <sub>2</sub> (M <sup>-1</sup> min <sup>-1</sup> ) | R <sup>2</sup> | MSC  |
| <b>2-CIPh</b>         | 1.30E-03          | 1.48E-03                         | 0.089                               | 0.9865         | 3.305 | 1.32E-03                          | 385.9                                               | 0.9998         | 8.02 |
| <b>3-CIPh</b>         | 1.62E-03          | 3.25E-03                         | 0.050                               | 0.9745         | 2.669 | 1.68E-03                          | 133.5                                               | 0.9960         | 5.21 |
| <b>4-CIPh</b>         | 1.64E-03          | 6.49E-04                         | 0.051                               | 0.9849         | 2.861 | 1.66E-03                          | 214.6                                               | 0.9996         | 7.52 |
| <b>3,4 Di-CIPh</b>    | 2.23E-03          | 7.23E-04                         | 0.048                               | 0.8769         | 0.761 | 2.27E-03                          | 169.8                                               | 0.9999         | 8.72 |
| <b>2,4,5 Tri-CIPh</b> | 1.05E-02          | 9.90E-03                         | 0.016                               | 0.9843         | 3.917 | 1.20E-02                          | 2.1                                                 | 0.9991         | 6.60 |
| <b>BPA</b>            | 1.74E-03          | 5.88E-04                         | 0.040                               | 0.8947         | 1.680 | 1.80E-03                          | 168.3                                               | 0.9995         | 7.24 |

Table SI-2. Kinetic parameters for adsorption of Chlorophenols and BPA onto 100% CEL film

| Analyte        | qe, expt (M/g) | Pseudo first-order kinetic model |                                     |                |       | Pseudo second-order kinetic model |                                                     |                |      |
|----------------|----------------|----------------------------------|-------------------------------------|----------------|-------|-----------------------------------|-----------------------------------------------------|----------------|------|
|                |                | qe(M/g)                          | K <sub>1</sub> (min <sup>-1</sup> ) | R <sup>2</sup> | MSC   | qe(M/g)                           | K <sub>2</sub> (M <sup>-1</sup> min <sup>-1</sup> ) | R <sup>2</sup> | MSC  |
| 2-CIPh         | 4.11E-04       | 1.45E-04                         | 0.029                               | 0.6469         | 0.041 | 3.93E-04                          | 702.3                                               | 0.9871         | 3.95 |
| 3-CIPh         | 3.19E-04       | 4.95E-04                         | 0.044                               | 0.9747         | 2.678 | 3.20E-04                          | 293.8                                               | 0.9822         | 3.72 |
| 4-CIPh         | 5.79E-04       | 1.69E-04                         | 0.055                               | 0.9559         | 1.788 | 5.81E-04                          | 2054.2                                              | 0.9999         | 9.13 |
| 3,4 Di-CIPh    | 7.98E-04       | 9.44E-04                         | 0.142                               | 0.9665         | 2.397 | 8.19E-04                          | 315.6                                               | 0.9996         | 7.47 |
| 2,4,5 Tri-CIPh | 1.87E-03       | 1.01E-03                         | 0.011                               | 0.9714         | 3.287 | 1.95E-03                          | 25.4                                                | 0.9967         | 5.32 |
| BPA            | 7.27E-04       | 4.62E-04                         | 0.014                               | 0.9715         | 3.156 | 8.05E-04                          | 78.9                                                | 0.9911         | 4.39 |

Table SI-3. Kinetic Parameters for Adsorption of Chlorophenols and BPA onto 50:50 CS:β-TCD Composite Material

|                       |                           | <i>Pseudo first-order kinetic model</i> |                         |        |       | <i>Pseudo second-order kinetic model</i> |                                       |        |      |
|-----------------------|---------------------------|-----------------------------------------|-------------------------|--------|-------|------------------------------------------|---------------------------------------|--------|------|
| Analyte               | $q_e, \text{ expt (M/g)}$ | $q_e(\text{M/g})$                       | $K_1 (\text{min}^{-1})$ | $R^2$  | MSC   | $q_e(\text{M/g})$                        | $K_2 (\text{M}^{-1} \text{min}^{-1})$ | $R^2$  | MSC  |
| <b>2-CIPh</b>         | 7.30E-04                  | 7.76E-04                                | 0.058                   | 0.9981 | 5.249 | 7.58E-04                                 | 268.4                                 | 0.9967 | 5.32 |
| <b>3-CIPh</b>         | 1.22E-03                  | 1.96E-03                                | 0.041                   | 0.9936 | 4.046 | 1.25E-03                                 | 118.6                                 | 0.9934 | 4.71 |
| <b>4-CIPh</b>         | 9.64E-04                  | 4.79E-03                                | 0.119                   | 0.9567 | 1.806 | 8.99E-04                                 | 313.1                                 | 0.9957 | 5.11 |
| <b>3,4 Di-CIPh</b>    | 1.87E-03                  | 1.45E-03                                | 0.055                   | 0.9636 | 2.647 | 1.99E-03                                 | 57.1                                  | 0.9978 | 5.77 |
| <b>2,4,5 Tri-CIPh</b> | 7.45E-03                  | 7.92E-03                                | 0.015                   | 0.9548 | 2.861 | 8.84E-03                                 | 2.1                                   | 0.9996 | 7.41 |
| <b>BPA</b>            | 1.42E-03                  | 1.12E-03                                | 0.028                   | 0.9782 | 3.381 | 1.59E-03                                 | 37.6                                  | 0.9994 | 7.11 |



Table SI-4. Kinetic parameters for adsorption of Chlorophenols and BPA onto 50:50 CEL:β-TCD Composite Material

| Analyte               | $q_e, \text{ expt}$<br>(M/g) | Pseudo first-order kinetic model |                            |                |       | Pseudo second-order kinetic model |                                            |                |      |
|-----------------------|------------------------------|----------------------------------|----------------------------|----------------|-------|-----------------------------------|--------------------------------------------|----------------|------|
|                       |                              | $q_e$ (M/g)                      | $k_1$ (min <sup>-1</sup> ) | R <sup>2</sup> | MSC   | $q_e$ (M/g)                       | $k_2$ (M <sup>-1</sup> min <sup>-1</sup> ) | R <sup>2</sup> | MSC  |
| <b>2-CIPh</b>         | 1.24E-03                     | 8.70E-04                         | 0.041                      | 0.8960         | 1.597 | 1.30E-03                          | 100.2                                      | 0.9975         | 5.57 |
| <b>3-CIPh</b>         | 9.26E-04                     | 5.55E-04                         | 0.020                      | 0.9410         | 2.259 | 9.87E-04                          | 77.9                                       | 0.9964         | 5.33 |
| <b>4-CIPh</b>         | 1.33E-03                     | 1.04E-03                         | 0.028                      | 0.8161         | 1.122 | 1.41E-03                          | 58.0                                       | 0.9993         | 6.93 |
| <b>3,4 Di-CIPh</b>    | 8.71E-04                     | 5.28E-04                         | 0.047                      | 0.9422         | 2.185 | 9.12E-04                          | 160.6                                      | 0.9992         | 6.84 |
| <b>2,4,5 Tri-CIPh</b> | 1.92E-03                     | 1.31E-03                         | 0.021                      | 0.9867         | 3.957 | 2.00E-03                          | 33.2                                       | 0.9995         | 7.26 |
| <b>BPA</b>            | 1.28E-03                     | 7.93E-04                         | 0.030                      | 0.9291         | 2.147 | 1.34E-03                          | 65.5                                       | 0.9987         | 6.28 |

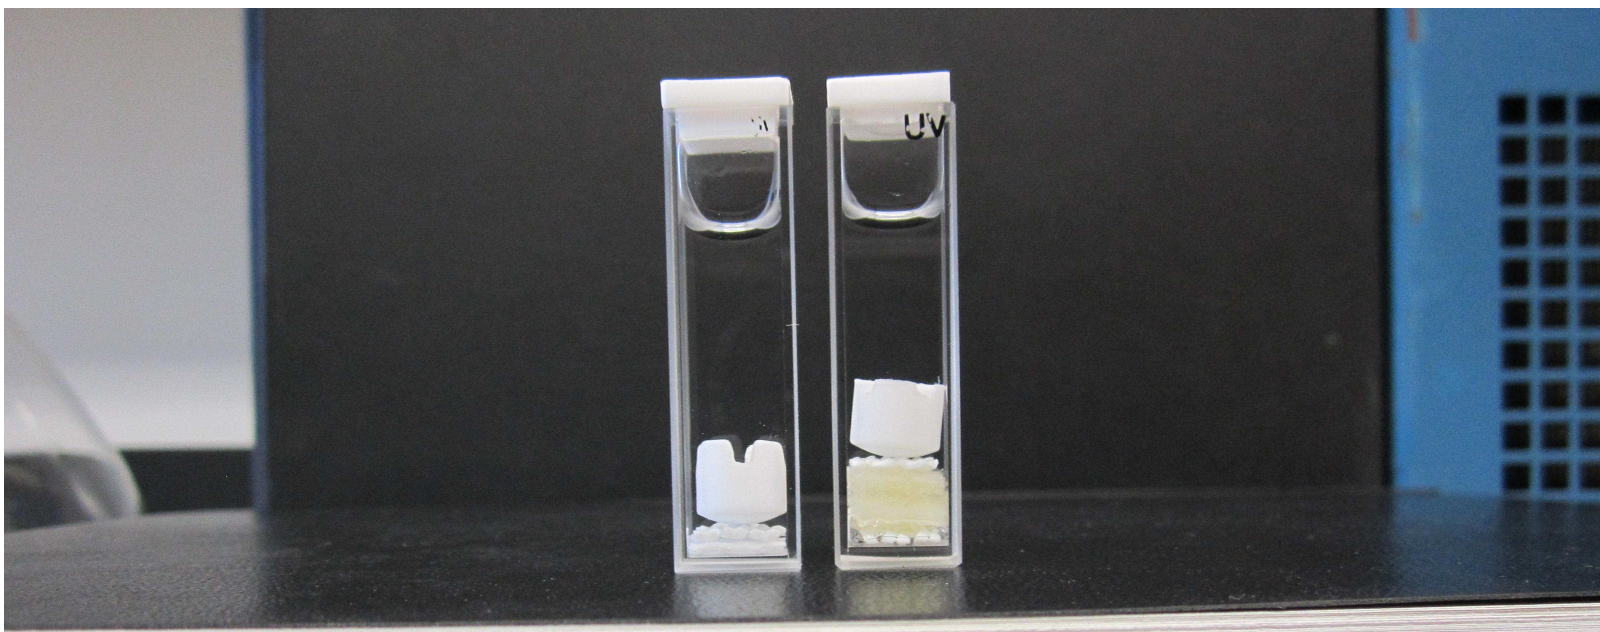

Figure SI-1. Photograph of two cells (sample cell (right) and blank (left)) used to measure adsorption kinetics of the pollutants by the composite materials. See text for detail description.

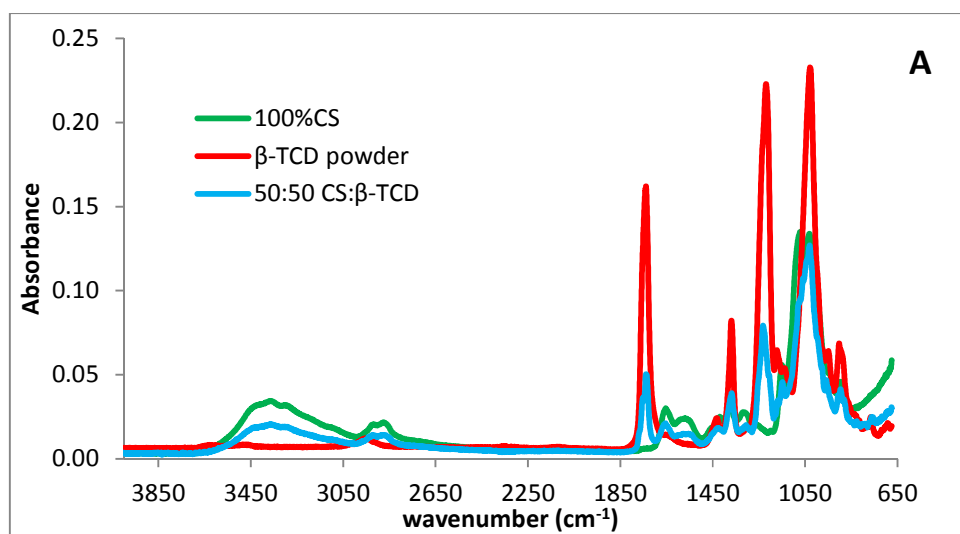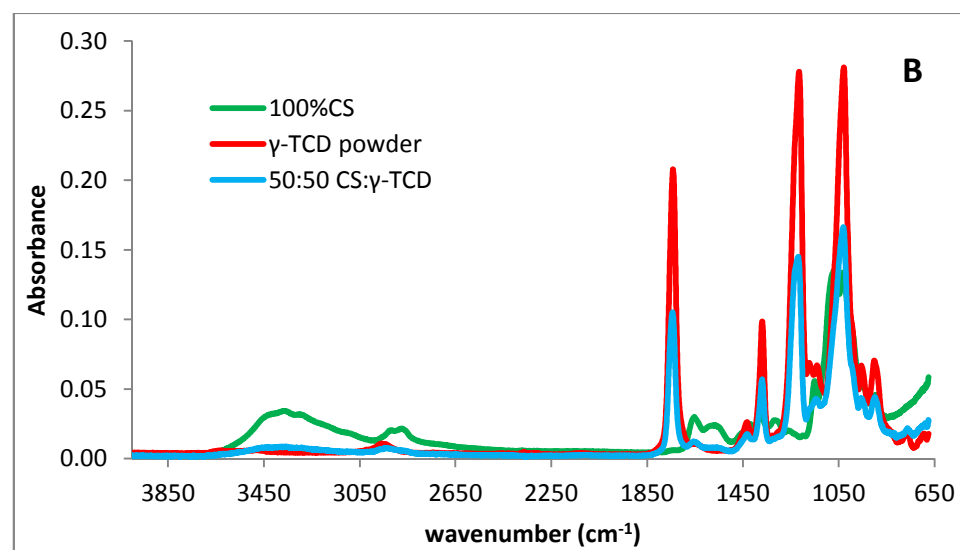

Figure SI-2. FTIR spectra of (A) 100%CS,  $\beta$ -TCD powder and 50:50 CS: $\beta$ -TCD and (B) 100%CS,  $\gamma$ -TCD and 50:50 CS: $\gamma$ -TCD

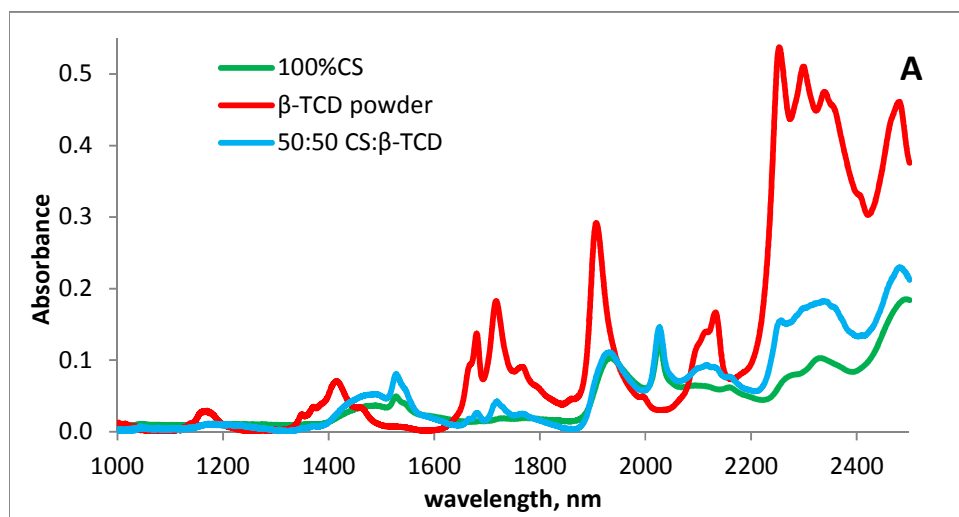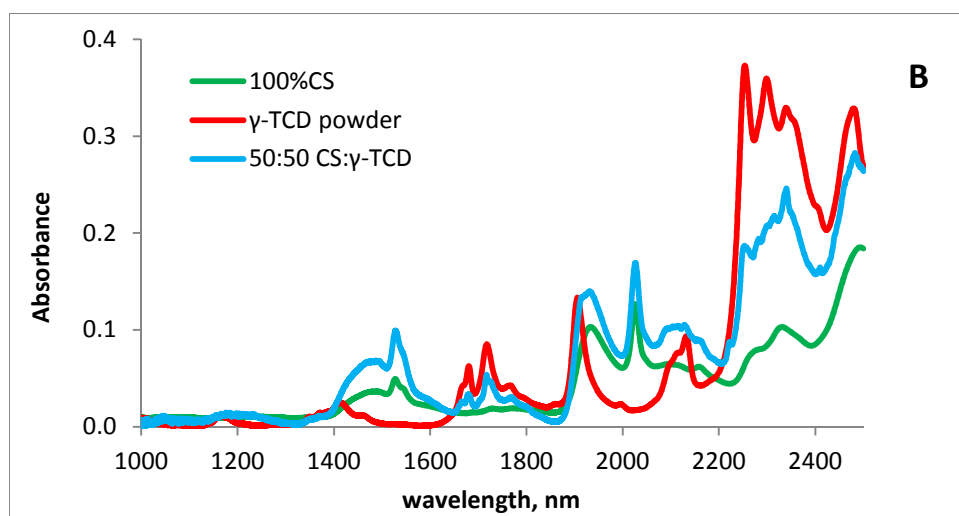

Figure SI-3. NIR spectra of (A) 100%CS,  $\beta$ -TCD powder and 50:50 CS: $\beta$ -TCD and (B) 100%CS,  $\gamma$ -TCD and 50:50 CS: $\gamma$ -TCD.

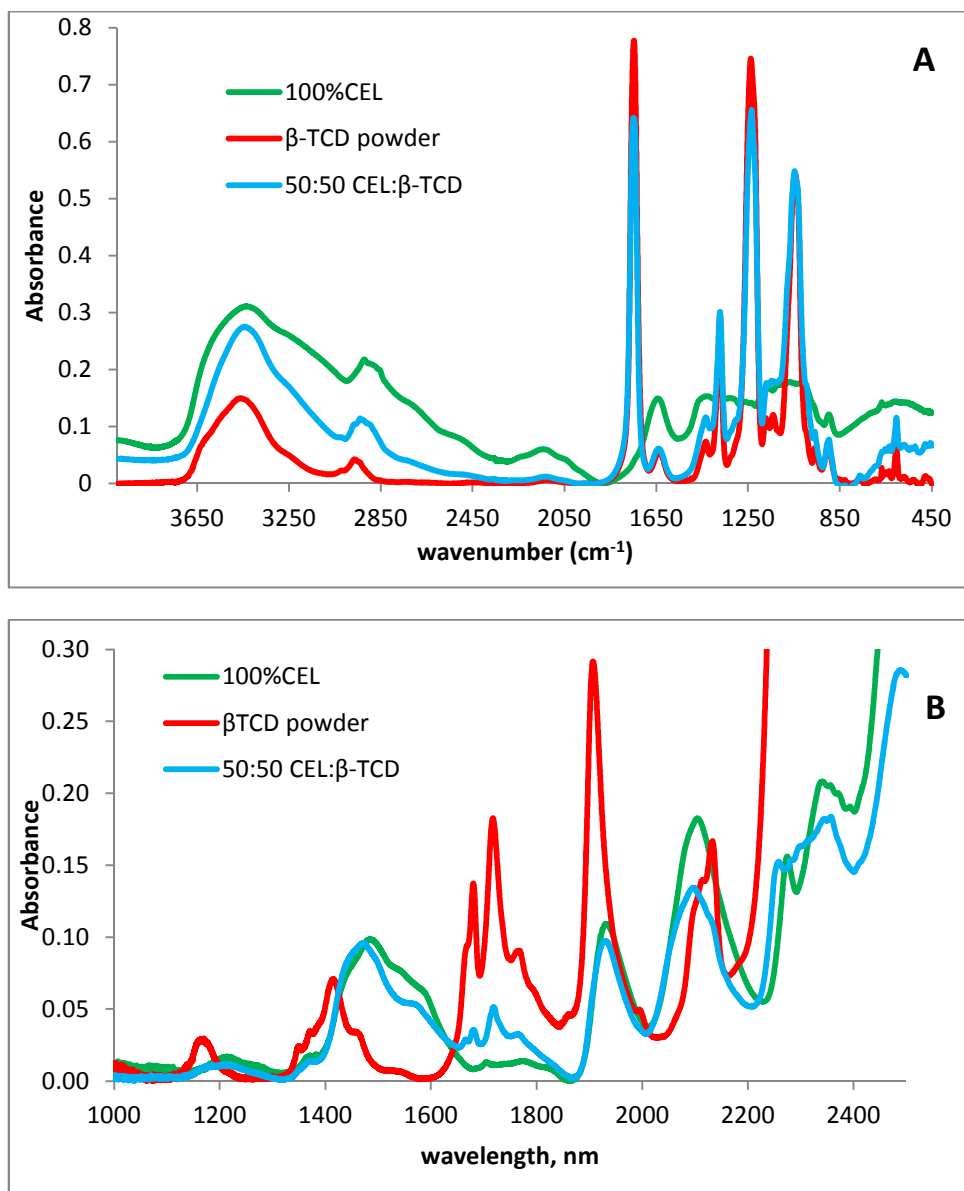

Figure SI-4. A) FT-IR and B) NIR spectra of CEL/TCD composite materials.

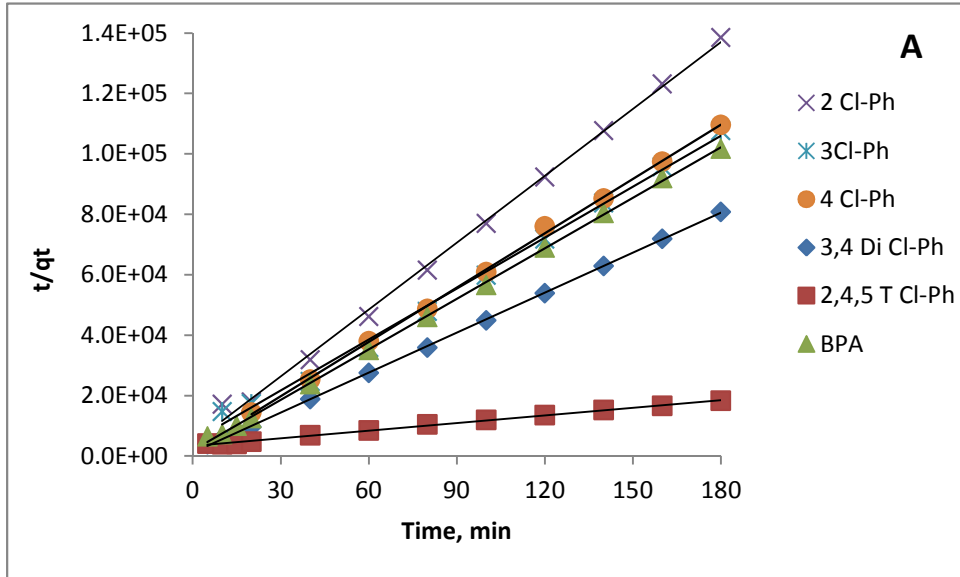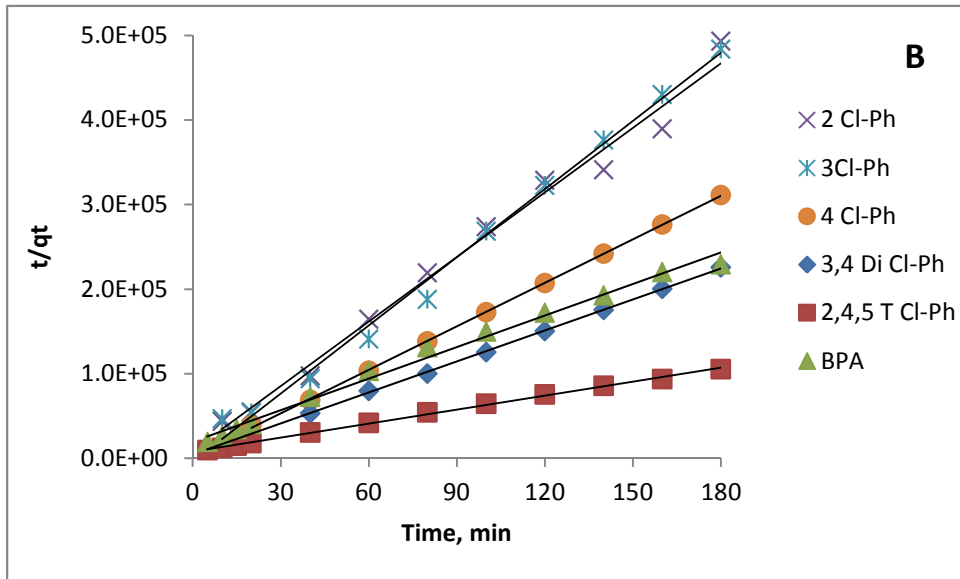

Figure SI-5: Pseudo second order linear plots for A) 100%CS and B) 100%CEL composite materials

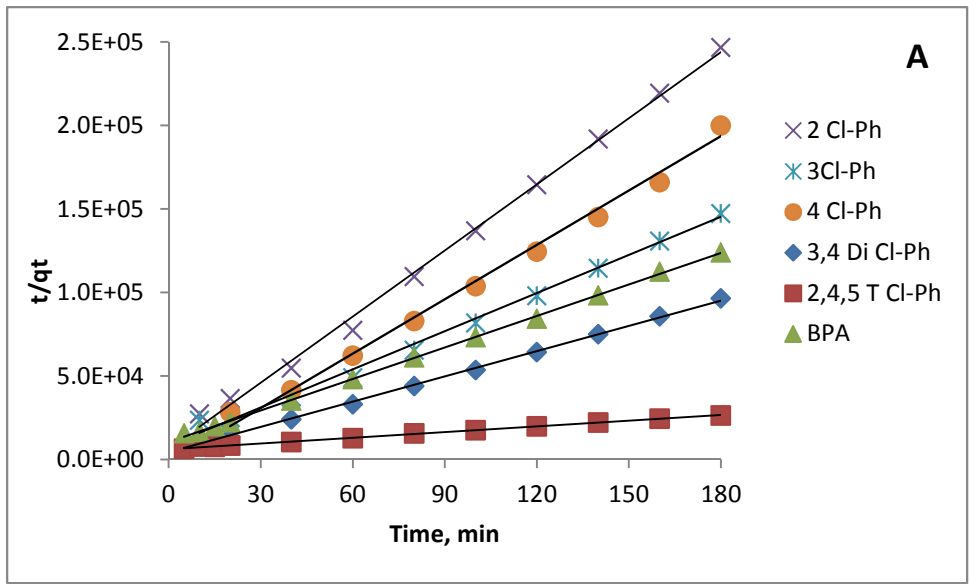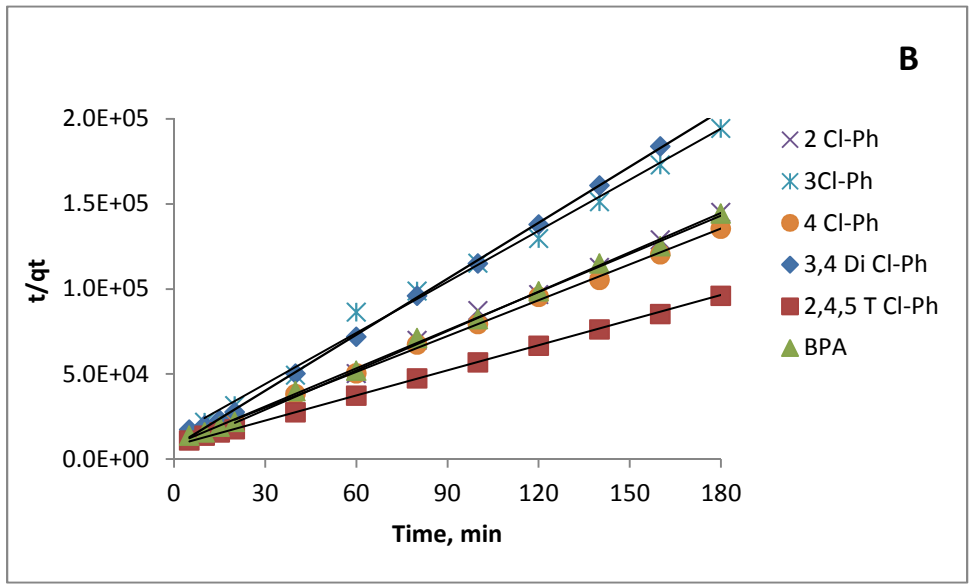

Figure SI-6: Pseudo second order linear plots for A) 50:50 CS:β-TCD and B) 50:50 CEL:β-TCD composite materials
